# Supplementary material for: Football and team handball training postpone cellular aging in women
Source: PubMed Central journal article supplement (PMC8175448; doi:10.1038/s41598-021-91255-7), 2021-06-03
Supplement: 41598_2021_91255_MOESM1_ESM.pdf [file 41598_2021_91255_MOESM1_ESM.pdf]

**A**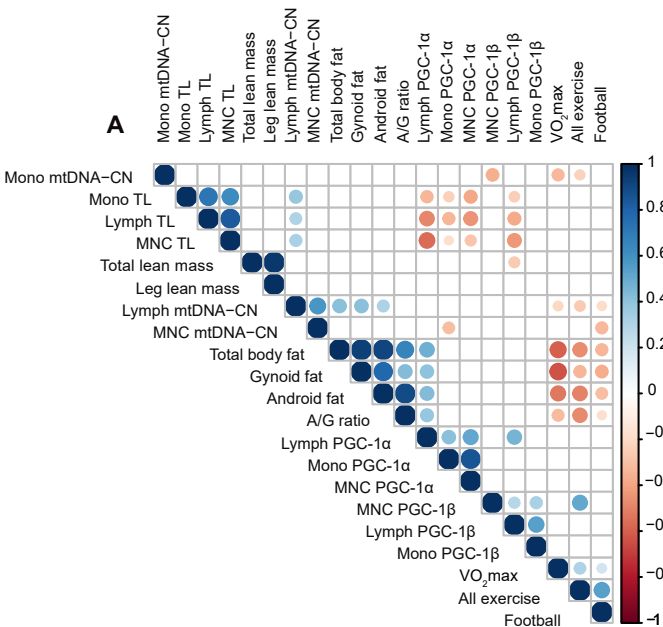**B**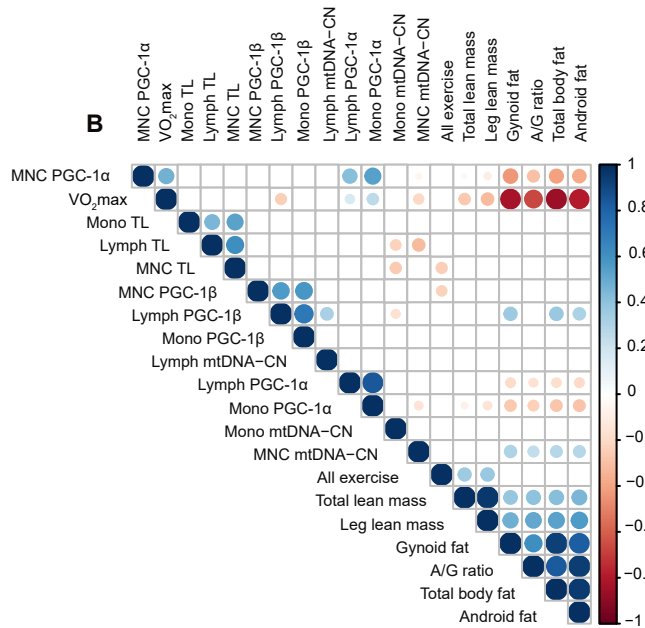**C**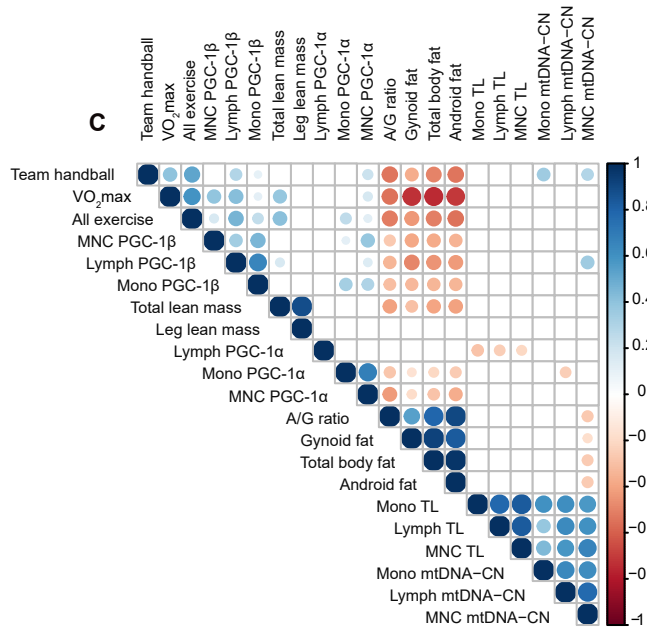**D**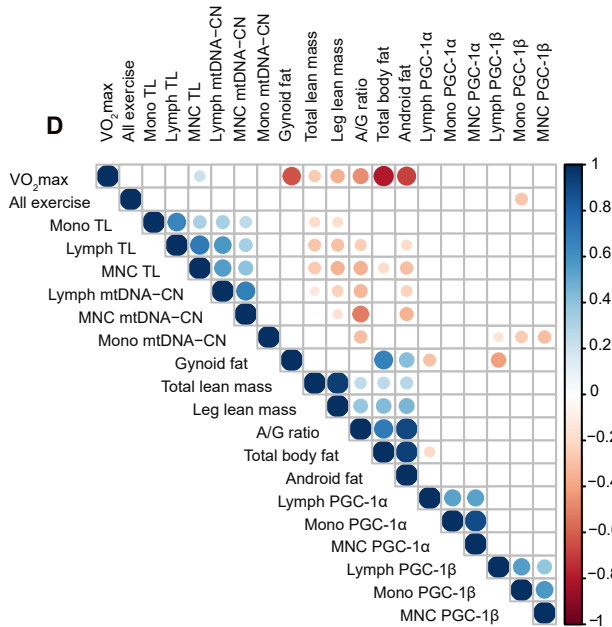

**Suppl. Figure 1.** Spearman's correlations between the investigated variables visualised as arc diagrams in young elite football players (YF,  $n=29$ ) **(A)**, young untrained controls (YC,  $n=30$ ) **(B)**, elderly team handball players (EH,  $n=35$ ) **(C)**, and elderly untrained controls (EC,  $n=35$ ) **(D)**.

A/G ratio, android/gynoid fat ratio; All exercise, hours of weekly exercise of all types; Football, hours of weekly football training; Lymph, lymphocytes; MNC, mononuclear cells; Mono, monocytes; mtDNA-CN, mitochondrial copy number; Team handball, hours of weekly team handball training; TL, telomere length; VO<sub>2</sub>max, maximal oxygen consumption.
