# Supplementary material for: Football and team handball training postpone cellular aging in women
Source: PubMed Central journal article supplement (PMC8175448; doi:10.1038/s41598-021-91255-7), 2021-06-03
Supplement: 41598_2021_91255_MOESM2_ESM.pdf [file 41598_2021_91255_MOESM2_ESM.pdf]

**Suppl. Table 1.** Univariate and multivariate analysis (ANOVA) of telomere length according to age and group in young and elderly participants.

| Telomere length |       | Univariate analysis |           |          |                | Multivariate analysis |           |          |                |
|-----------------|-------|---------------------|-----------|----------|----------------|-----------------------|-----------|----------|----------------|
| <i>Young</i>    |       | <i>Coef.</i>        | <i>SE</i> | <i>t</i> | <i>p-value</i> | <i>Coef.</i>          | <i>SE</i> | <i>t</i> | <i>p-value</i> |
| MNC             | Age   | -0.002              | 0.066     | -0.03    | 0.974          | 0.078                 | 0.079     | 1.12     | 0.266          |
|                 | Group | -0.907              | 0.376     | -2.41    | <b>0.019</b>   | -1.110                | 0.417     | -2.66    | <b>0.010</b>   |
| Lymphocytes     | Age   | 0.016               | 0.088     | 0.18     | 0.856          | 0.116                 | 0.093     | 1.25     | 0.216          |
|                 | Group | -1.081              | 0.503     | -2.15    | <b>0.036</b>   | -1.383                | 0.555     | -2.49    | <b>0.016</b>   |
| Monocytes       | Age   | 0.022               | 0.062     | 0.36     | 0.722          | 0.047                 | 0.069     | 0.68     | 0.498          |
|                 | Group | -0.221              | 0.370     | -0.60    | 0.552          | -0.343                | 0.413     | -0.83    | 0.409          |
| <i>Elderly</i>  |       |                     |           |          |                |                       |           |          |                |
| MNC             | Age   | -0.032              | 0.028     | -1.16    | 0.251          | -0.032                | 0.029     | -1.10    | 0.276          |
|                 | Group | -0.077              | 0.230     | -0.34    | 0.737          | -0.006                | 0.238     | -0.03    | 0.979          |
| Lymphocytes     | Age   | -0.045              | 0.029     | -1.54    | 0.127          | -0.043                | 0.030     | -1.41    | 0.163          |
|                 | Group | -0.155              | 0.239     | -0.65    | 0.520          | -0.060                | 0.247     | -0.24    | 0.808          |
| Monocytes       | Age   | -0.006              | 0.028     | -0.21    | 0.835          | 0.002                 | 0.029     | 0.08     | 0.934          |
|                 | Group | -0.244              | 0.227     | -1.07    | 0.287          | -0.249                | 0.238     | -1.05    | 0.299          |

The multivariate analysis is corrected for age.

**Suppl. Table 2.** Univariate and multivariate analysis (ANOVA) of mitochondrial copy number according to age and group in young and elderly participants.

| <b>mtDNA copy number</b> |       | <b>Univariate analysis</b> |           |          |                | <b>Multivariate analysis</b> |           |          |                |
|--------------------------|-------|----------------------------|-----------|----------|----------------|------------------------------|-----------|----------|----------------|
| <i>Young</i>             |       | <i>Coef.</i>               | <i>SE</i> | <i>t</i> | <i>p-value</i> | <i>Coef.</i>                 | <i>SE</i> | <i>t</i> | <i>p-value</i> |
| MNC                      | Age   | -6.254                     | 10.852    | -0.58    | 0.567          | 6.680                        | 11.478    | 0.58     | 0.563          |
|                          | Group | -160.801                   | 61.398    | -2.62    | <b>0.011</b>   | -178.100                     | 68.538    | -2.60    | <b>0.012</b>   |
| Lymphocytes              | Age   | -9.290                     | 9.321     | -1.00    | 0.323          | 0.858                        | 9.957     | 0.09     | 0.932          |
|                          | Group | -137.513                   | 53.107    | -2.59    | <b>0.012</b>   | -139.735                     | 59.458    | -2.35    | <b>0.022</b>   |
| Monocytes                | Age   | -1.783                     | 5.074     | -0.35    | 0.727          | -3.415                       | 5.660     | -0.60    | 0.549          |
|                          | Group | 13.637                     | 30.280    | 0.45     | 0.654          | 22.481                       | 33.793    | 0.67     | 0.509          |
| <b><i>Elderly</i></b>    |       |                            |           |          |                |                              |           |          |                |
| MNC                      | Age   | -7.889                     | 9.242     | -0.85    | 0.396          | -11.556                      | 9.535     | -1.21    | 0.230          |
|                          | Group | 84.614                     | 75.407    | 1.12     | 0.266          | 110.366                      | 78.095    | 1.41     | 0.162          |
| Lymphocytes              | Age   | -7.469                     | 10.029    | -0.74    | 0.459          | -13.135                      | 10.187    | -1.29    | 0.202          |
|                          | Group | 141.287                    | 80.679    | 1.75     | 0.084          | 170.559                      | 83.437    | 2.04     | <b>0.045</b>   |
| Monocytes                | Age   | -2.040                     | 3.551     | -0.57    | 0.568          | -1.135                       | 3.695     | -0.31    | 0.760          |
|                          | Group | -29.750                    | 28.928    | -1.03    | 0.307          | -27.219                      | 30.264    | -0.90    | 0.372          |

The multivariate analysis is corrected for age.

**Suppl. Table 3.** Univariate and multivariate analysis (ANOVA) of mitochondrial function according to age and group in young and elderly participants.

| <b>Mitochondrial</b> |       |                            |           |          |                |                              |           |          |                |
|----------------------|-------|----------------------------|-----------|----------|----------------|------------------------------|-----------|----------|----------------|
| <b>function</b>      |       | <b>Univariate analysis</b> |           |          |                | <b>Multivariate analysis</b> |           |          |                |
| <i>Young</i>         |       | <i>Coef.</i>               | <i>SE</i> | <i>t</i> | <i>p-value</i> | <i>Coef.</i>                 | <i>SE</i> | <i>t</i> | <i>p-value</i> |
| <u>MNC</u>           |       |                            |           |          |                |                              |           |          |                |
| PGC-1 $\alpha$       | Age   | -0.000                     | 0.000     | -1.30    | 0.199          | -0.000                       | 0.000     | -0.66    | 0.511          |
|                      | Group | -0.000                     | 0.000     | -1.64    | 0.107          | -0.000                       | 0.000     | -1.18    | 0.242          |
| PGC-1 $\beta$        | Age   | -0.000                     | 0.001     | -0.26    | 0.798          | 0.000                        | 0.001     | 0.26     | 0.795          |
|                      | Group | -0.007                     | 0.006     | -1.14    | 0.258          | -0.008                       | 0.007     | -1.14    | 0.261          |
| <u>Lymphocytes</u>   |       |                            |           |          |                |                              |           |          |                |
| PGC-1 $\alpha$       | Age   | -0.000                     | 0.000     | -1.33    | 0.189          | -0.000                       | 0.000     | -1.20    | 0.236          |
|                      | Group | -0.000                     | 0.000     | -0.55    | 0.585          | 0.000                        | 0.000     | 0.02     | 0.982          |
| PGC-1 $\beta$        | Age   | -0.000                     | 0.001     | -0.09    | 0.929          | 0.000                        | 0.001     | 0.20     | 0.839          |
|                      | Group | -0.003                     | 0.005     | -0.64    | 0.527          | -0.004                       | 0.006     | -0.66    | 0.514          |
| <u>Monocytes</u>     |       |                            |           |          |                |                              |           |          |                |
| PGC-1 $\alpha$       | Age   | -0.000                     | 0.000     | -0.32    | 0.751          | -0.000                       | 0.000     | -0.39    | 0.698          |
|                      | Group | 0.000                      | 0.000     | 0.08     | 0.935          | 0.000                        | 0.000     | 0.24     | 0.809          |
| PGC-1 $\beta$        | Age   | 0.000                      | 0.000     | 0.87     | 0.390          | 0.000                        | 0.001     | 0.39     | 0.700          |
|                      | Group | 0.003                      | 0.003     | 1.20     | 0.235          | 0.003                        | 0.003     | 0.91     | 0.369          |
| <i>Elderly</i>       |       |                            |           |          |                |                              |           |          |                |
| <u>MNC</u>           |       |                            |           |          |                |                              |           |          |                |
| PGC-1 $\alpha$       | Age   | -0.000                     | 0.000     | -1.44    | 0.154          | -0.000                       | 0.000     | -0.93    | 0.354          |
|                      | Group | -0.000                     | 0.000     | -2.08    | <b>0.041</b>   | -0.000                       | 0.000     | -1.75    | 0.085          |
| PGC-1 $\beta$        | Age   | -0.001                     | 0.001     | -1.42    | 0.162          | -0.001                       | 0.001     | -0.91    | 0.365          |
|                      | Group | -0.010                     | 0.005     | -2.05    | <b>0.044</b>   | -0.009                       | 0.005     | -1.72    | 0.089          |
| <u>Lymphocytes</u>   |       |                            |           |          |                |                              |           |          |                |
| PGC-1 $\alpha$       | Age   | -0.000                     | 0.000     | -1.34    | 0.186          | -0.000                       | 0.000     | -0.64    | 0.526          |
|                      | Group | -0.000                     | 0.000     | -2.87    | <b>0.006</b>   | -0.000                       | 0.000     | -2.57    | <b>0.012</b>   |
| PGC-1 $\beta$        | Age   | -0.001                     | 0.000     | -1.65    | 0.104          | -0.000                       | 0.000     | -1.22    | 0.228          |
|                      | Group | -0.005                     | 0.003     | -1.79    | 0.077          | -0.004                       | 0.003     | -1.40    | 0.166          |
| <u>Monocytes</u>     |       |                            |           |          |                |                              |           |          |                |
| PGC-1 $\alpha$       | Age   | 0.000                      | 0.000     | 0.17     | 0.865          | 0.000                        | 0.000     | 0.25     | 0.806          |
|                      | Group | -0.000                     | 0.000     | -0.25    | 0.802          | -0.000                       | 0.000     | -0.31    | 0.760          |
| PGC-1 $\beta$        | Age   | 0.000                      | 0.000     | 0.21     | 0.830          | 0.000                        | 0.000     | 0.15     | 0.882          |
|                      | Group | 0.000                      | 0.001     | 0.26     | 0.795          | 0.000                        | 0.001     | 0.21     | 0.835          |

The multivariate analysis is corrected for age.
