# Supplementary material for: Football and team handball training postpone cellular aging in women
Source: PubMed Central journal article supplement (PMC8175448; doi:10.1038/s41598-021-91255-7), 2021-06-03
Supplement: 41598_2021_91255_MOESM3_ESM.pdf [file 41598_2021_91255_MOESM3_ESM.pdf]

**Suppl. Table 4.** Spearman's correlations between the investigated variables in all young participants ( $n=59$ ).

|                      | Lymph TL | Lymph mtDNA-CN | Lymph PGC-1 $\alpha$ | Lymph PGC-1 $\beta$ | Mono TL | Mono mtDNA-CN | Mono PGC-1 $\alpha$ | Mono PGC-1 $\beta$ | MNC TL | MNC mtDNA-CN | MNC PGC-1 $\alpha$ | MNC PGC-1 $\beta$ | VO <sub>2max</sub> | Total body fat | Android fat | Gynoid fat | A/G ratio | Total lean mass | Leg lean mass | All exercise | Football |
|----------------------|----------|----------------|----------------------|---------------------|---------|---------------|---------------------|--------------------|--------|--------------|--------------------|-------------------|--------------------|----------------|-------------|------------|-----------|-----------------|---------------|--------------|----------|
| Lymph TL             | 1        | 0.334          | -0.234               | -0.234              | 0.657   | -0.081        | -0.115              | -0.068             | 0.797  | 0.117        | -0.179             | -0.037            | 0.103              | -0.212         | -0.180      | -0.187     | -0.145    | 0.180           | 0.112         | 0.274        | 0.256    |
| Lymph mtDNA-CN       |          | 1              | 0.201                | 0.119               | 0.198   | 0.067         | 0.152               | 0.050              | 0.314  | 0.535        | 0.136              | 0.081             | 0.028              | 0.088          | 0.100       | 0.063      | 0.108     | 0.230           | 0.187         | 0.231        | 0.279    |
| Lymph PGC-1 $\alpha$ |          |                | 1                    | 0.377               | -0.244  | -0.003        | 0.646               | 0.021              | -0.376 | -0.154       | 0.470              | 0.049             | 0.032              | 0.058          | 0.022       | 0.055      | 0.056     | 0.039           | 0.017         | 0.023        | 0.081    |
| Lymph PGC-1 $\beta$  |          |                |                      | 1                   | -0.210  | -0.147        | 0.105               | 0.555              | -0.246 | 0.133        | 0.014              | 0.371             | 0.003              | 0.114          | 0.129       | 0.095      | 0.149     | -0.011          | 0.010         | 0.136        | 0.129    |
| Mono TL              |          |                |                      |                     | 1       | 0.155         | -0.126              | -0.069             | 0.595  | 0.067        | -0.189             | -0.144            | -0.090             | -0.072         | -0.096      | -0.006     | -0.152    | 0.130           | 0.087         | 0.062        | 0.079    |
| Mono mtDNA-CN        |          |                |                      |                     |         | 1             | 0.024               | 0.009              | -0.068 | 0.112        | 0.030              | -0.206            | -0.100             | 0.049          | 0.051       | 0.004      | 0.091     | -0.087          | -0.077        | -0.101       | -0.063   |
| Mono PGC-1 $\alpha$  |          |                |                      |                     |         |               | 1                   | 0.096              | -0.127 | -0.213       | 0.662              | -0.061            | 0.114              | -0.084         | -0.137      | -0.071     | -0.119    | -0.111          | -0.109        | -0.066       | -0.019   |
| Mono PGC-1 $\beta$   |          |                |                      |                     |         |               |                     | 1                  | -0.014 | 0.014        | -0.049             | 0.418             | -0.177             | 0.226          | 0.186       | 0.253      | 0.089     | -0.042          | 0.059         | -0.131       | -0.128   |
| MNC TL               |          |                |                      |                     |         |               |                     |                    | 1      | 0.194        | -0.070             | -0.003            | 0.163              | -0.173         | -0.134      | -0.134     | -0.130    | 0.137           | 0.100         | 0.302        | 0.287    |
| MNC mtDNA-CN         |          |                |                      |                     |         |               |                     |                    |        | 1            | -0.057             | 0.157             | 0.117              | 0.022          | 0.058       | 0.029      | 0.077     | 0.201           | 0.187         | 0.244        | 0.251    |
| MNC PGC-1 $\alpha$   |          |                |                      |                     |         |               |                     |                    |        |              | 1                  | 0.079             | 0.339              | -0.196         | -0.239      | -0.198     | -0.189    | 0.034           | 0.015         | 0.158        | 0.211    |
| MNC PGC-1 $\beta$    |          |                |                      |                     |         |               |                     |                    |        |              |                    | 1                 | 0.188              | -0.127         | -0.131      | -0.116     | -0.133    | -0.016          | -0.016        | 0.268        | 0.161    |
| VO <sub>2max</sub>   |          |                |                      |                     |         |               |                     |                    |        |              |                    |                   | 1                  | -0.825         | -0.749      | -0.839     | -0.565    | 0.191           | 0.114         | 0.687        | 0.679    |
| Total body fat       |          |                |                      |                     |         |               |                     |                    |        |              |                    |                   |                    | 1              | 0.953       | 0.952      | 0.782     | -0.076          | 0.020         | -0.603       | -0.586   |
| Android fat          |          |                |                      |                     |         |               |                     |                    |        |              |                    |                   |                    |                | 1           | 0.846      | 0.923     | -0.012          | 0.086         | -0.522       | -0.497   |
| Gynoid fat           |          |                |                      |                     |         |               |                     |                    |        |              |                    |                   |                    |                |             | 1          | 0.595     | -0.114          | -0.021        | -0.635       | -0.638   |
| A/G ratio            |          |                |                      |                     |         |               |                     |                    |        |              |                    |                   |                    |                |             |            | 1         | 0.039           | 0.121         | -0.374       | -0.323   |
| Total lean mass      |          |                |                      |                     |         |               |                     |                    |        |              |                    |                   |                    |                |             |            |           | 1               | 0.971         | 0.463        | 0.520    |
| Leg lean mass        |          |                |                      |                     |         |               |                     |                    |        |              |                    |                   |                    |                |             |            |           |                 | 1             | 0.399        | 0.457    |
| All exercise         |          |                |                      |                     |         |               |                     |                    |        |              |                    |                   |                    |                |             |            |           |                 |               | 1            | 0.957    |
| Football             |          |                |                      |                     |         |               |                     |                    |        |              |                    |                   |                    |                |             |            |           |                 |               |              | 1        |

A/G ratio, android/gynoid fat ratio; All exercise, hours of weekly exercise of all types; Football, hours of weekly football training; Lymph, lymphocytes; MNC, mononuclear cells; Mono, monocytes; mtDNA-CN, mitochondrial copy number; TL, telomere length; VO<sub>2max</sub>, maximal oxygen consumption.

**Suppl. Table 5.** Spearman's correlations between the investigated variables in all elderly participants ( $n=70$ ).

|                      | Lymph TL | Lymph mtDNA-CN | Lymph PGC-1 $\alpha$ | Lymph PGC-1 $\beta$ | Mono TL | Mono mtDNA-CN | Mono PGC-1 $\alpha$ | Mono PGC-1 $\beta$ | MNC TL | MNC mtDNA-CN | MNC PGC-1 $\alpha$ | MNC PGC-1 $\beta$ | VO <sub>2max</sub> | Total body fat | Android fat | Gynoid fat | A/G ratio | Total lean mass | Leg lean mass | All exercise | Team handball |
|----------------------|----------|----------------|----------------------|---------------------|---------|---------------|---------------------|--------------------|--------|--------------|--------------------|-------------------|--------------------|----------------|-------------|------------|-----------|-----------------|---------------|--------------|---------------|
| Lymph TL             | 1        | 0.556          | -0.157               | 0.184               | 0.732   | 0.323         | -0.090              | 0.148              | 0.770  | 0.454        | -0.032             | 0.059             | 0.109              | -0.182         | -0.194      | -0.106     | -0.219    | -0.135          | -0.177        | -0.030       | 0.084         |
| Lymph mtDNA-CN       |          | 1              | 0.075                | -0.005              | 0.413   | 0.337         | -0.089              | -0.046             | 0.541  | 0.724        | -0.103             | -0.094            | -0.107             | 0.056          | -0.038      | 0.193      | -0.163    | -0.159          | -0.176        | -0.194       | -0.157        |
| Lymph PGC-1 $\alpha$ |          |                | 1                    | 0.347               | -0.203  | 0.192         | 0.298               | 0.031              | -0.116 | 0.112        | 0.329              | -0.028            | 0.201              | -0.089         | -0.054      | -0.167     | 0.058     | 0.123           | 0.120         | 0.273        | 0.217         |
| Lymph PGC-1 $\beta$  |          |                |                      | 1                   | 0.050   | 0.124         | 0.034               | 0.527              | 0.184  | 0.156        | 0.165              | 0.376             | 0.419              | -0.413         | -0.359      | -0.490     | -0.225    | 0.211           | 0.157         | 0.418        | 0.292         |
| Mono TL              |          |                |                      |                     | 1       | 0.471         | -0.098              | 0.031              | 0.598  | 0.400        | -0.038             | -0.105            | 0.050              | -0.162         | -0.176      | -0.095     | -0.188    | -0.085          | -0.146        | -0.016       | 0.192         |
| Mono mtDNA-CN        |          |                |                      |                     |         | 1             | -0.021              | -0.186             | 0.218  | 0.383        | 0.012              | -0.260            | 0.100              | -0.146         | -0.163      | -0.047     | -0.192    | 0.000           | -0.019        | 0.144        | 0.228         |
| Mono PGC-1 $\alpha$  |          |                |                      |                     |         |               | 1                   | 0.228              | -0.021 | 0.164        | 0.740              | 0.020             | 0.002              | -0.054         | -0.088      | -0.034     | -0.107    | 0.037           | 0.004         | 0.077        | -0.007        |
| Mono PGC-1 $\beta$   |          |                |                      |                     |         |               |                     | 1                  | 0.119  | 0.110        | 0.190              | 0.451             | -0.037             | -0.064         | -0.077      | -0.160     | -0.045    | 0.095           | 0.052         | 0.029        | -0.030        |
| MNC TL               |          |                |                      |                     |         |               |                     |                    | 1      | 0.512        | 0.018              | -0.025            | 0.089              | -0.220         | -0.269      | -0.110     | -0.313    | -0.124          | -0.204        | -0.029       | 0.097         |
| MNC mtDNA-CN         |          |                |                      |                     |         |               |                     |                    |        | 1            | 0.125              | -0.039            | 0.004              | -0.106         | -0.221      | 0.087      | -0.345    | 0.012           | -0.051        | -0.035       | -0.039        |
| MNC PGC-1 $\alpha$   |          |                |                      |                     |         |               |                     |                    |        |              | 1                  | 0.302             | 0.211              | -0.285         | -0.323      | -0.225     | -0.322    | 0.099           | 0.019         | 0.217        | 0.262         |
| MNC PGC-1 $\beta$    |          |                |                      |                     |         |               |                     |                    |        |              |                    | 1                 | 0.304              | -0.291         | -0.262      | -0.359     | -0.165    | 0.108           | -0.003        | 0.249        | 0.223         |
| VO <sub>2max</sub>   |          |                |                      |                     |         |               |                     |                    |        |              |                    |                   | 1                  | -0.812         | -0.742      | -0.771     | -0.538    | 0.301           | 0.118         | 0.675        | 0.590         |
| Total body fat       |          |                |                      |                     |         |               |                     |                    |        |              |                    |                   |                    | 1              | 0.959       | 0.879      | 0.759     | -0.260          | 0.005         | -0.582       | -0.555        |
| Android fat          |          |                |                      |                     |         |               |                     |                    |        |              |                    |                   |                    |                | 1           | 0.741      | 0.903     | -0.213          | 0.045         | -0.546       | -0.500        |
| Gynoid fat           |          |                |                      |                     |         |               |                     |                    |        |              |                    |                   |                    |                |             | 1          | 0.397     | -0.271          | -0.037        | -0.560       | -0.537        |
| A/G ratio            |          |                |                      |                     |         |               |                     |                    |        |              |                    |                   |                    |                |             |            | 1         | -0.151          | 0.049         | -0.426       | -0.372        |
| Total lean mass      |          |                |                      |                     |         |               |                     |                    |        |              |                    |                   |                    |                |             |            |           | 1               | 0.926         | 0.482        | 0.400         |
| Leg lean mass        |          |                |                      |                     |         |               |                     |                    |        |              |                    |                   |                    |                |             |            |           |                 | 1             | 0.369        | 0.276         |
| All exercise         |          |                |                      |                     |         |               |                     |                    |        |              |                    |                   |                    |                |             |            |           |                 |               | 1            | 0.830         |
| Team handball        |          |                |                      |                     |         |               |                     |                    |        |              |                    |                   |                    |                |             |            |           |                 |               |              | 1             |

A/G ratio, android/gynoid fat ratio; All exercise, hours of weekly exercise of all types; Lymph, lymphocytes; MNC, mononuclear cells; Mono, monocytes; mtDNA-CN, mitochondrial copy number; Team handball, hours of weekly team handball training; TL, telomere length; VO<sub>2max</sub>, maximal oxygen consumption.

**Suppl. Table 6.** Spearman's correlations between the investigated variables in young elite football players (YF,  $n=29$ ).

|                      | Lymph TL | Lymph mtDNA-CN | Lymph PGC-1 $\alpha$ | Lymph PGC-1 $\beta$ | Mono TL | Mono mtDNA-CN | Mono PGC-1 $\alpha$ | Mono PGC-1 $\beta$ | MNC TL | MNC mtDNA-CN | MNC PGC-1 $\alpha$ | MNC PGC-1 $\beta$ | VO <sub>2max</sub> | Total body fat | Android fat | Gynoid fat | A/G ratio | Total lean mass | Leg lean mass | All exercise | Football |
|----------------------|----------|----------------|----------------------|---------------------|---------|---------------|---------------------|--------------------|--------|--------------|--------------------|-------------------|--------------------|----------------|-------------|------------|-----------|-----------------|---------------|--------------|----------|
| Lymph TL             | 1        | 0.307          | -0.489               | -0.377              | 0.727   | 0.016         | -0.337              | -0.096             | 0.836  | 0.199        | -0.442             | -0.100            | -0.138             | -0.119         | -0.081      | -0.059     | -0.097    | 0.025           | -0.017        | 0.066        | -0.065   |
| Lymph mtDNA-CN       |          | 1              | -0.078               | -0.020              | 0.381   | 0.206         | -0.071              | -0.034             | 0.321  | 0.584        | 0.072              | -0.065            | -0.209             | 0.420          | 0.313       | 0.420      | 0.156     | 0.053           | 0.003         | -0.252       | -0.188   |
| Lymph PGC-1 $\alpha$ |          |                | 1                    | 0.468               | -0.337  | -0.077        | 0.414               | 0.055              | -0.562 | -0.195       | 0.514              | 0.017             | -0.149             | 0.488          | 0.434       | 0.407      | 0.382     | 0.010           | 0.033         | -0.057       | 0.250    |
| Lymph PGC-1 $\beta$  |          |                |                      | 1                   | -0.242  | -0.144        | 0.046               | 0.546              | -0.437 | 0.116        | 0.063              | 0.281             | 0.011              | 0.098          | 0.138       | 0.096      | 0.178     | -0.260          | -0.239        | 0.196        | 0.251    |
| Mono TL              |          |                |                      |                     | 1       | 0.278         | -0.233              | -0.053             | 0.627  | 0.140        | -0.380             | -0.163            | -0.274             | -0.001         | -0.056      | 0.096      | -0.161    | 0.216           | 0.158         | -0.030       | 0.008    |
| Mono mtDNA-CN        |          |                |                      |                     |         | 1             | 0.158               | 0.111              | 0.072  | 0.007        | -0.025             | -0.360            | -0.325             | 0.134          | 0.132       | 0.079      | 0.128     | -0.058          | -0.050        | -0.221       | -0.073   |
| Mono PGC-1 $\alpha$  |          |                |                      |                     |         |               | 1                   | 0.122              | -0.172 | -0.303       | 0.856              | -0.230            | 0.068              | 0.161          | 0.058       | 0.103      | 0.043     | -0.167          | -0.079        | -0.208       | -0.006   |
| Mono PGC-1 $\beta$   |          |                |                      |                     |         |               |                     | 1                  | -0.142 | 0.046        | -0.048             | 0.329             | -0.115             | -0.008         | -0.015      | 0.021      | -0.011    | -0.165          | -0.063        | -0.010       | 0.017    |
| MNC TL               |          |                |                      |                     |         |               |                     |                    | 1      | 0.132        | -0.270             | -0.097            | -0.086             | -0.031         | 0.018       | 0.028      | -0.042    | -0.033          | -0.058        | 0.076        | -0.061   |
| MNC mtDNA-CN         |          |                |                      |                     |         |               |                     |                    |        | 1            | -0.185             | 0.220             | -0.065             | 0.232          | 0.224       | 0.274      | 0.144     | 0.127           | 0.079         | -0.181       | -0.327   |
| MNC PGC-1 $\alpha$   |          |                |                      |                     |         |               |                     |                    |        |              | 1                  | -0.075            | 0.105              | 0.289          | 0.131       | 0.237      | 0.056     | -0.125          | -0.085        | -0.131       | 0.059    |
| MNC PGC-1 $\beta$    |          |                |                      |                     |         |               |                     |                    |        |              |                    | 1                 | 0.063              | 0.001          | -0.077      | 0.073      | -0.162    | -0.114          | -0.125        | 0.515        | 0.115    |
| VO <sub>2max</sub>   |          |                |                      |                     |         |               |                     |                    |        |              |                    |                   | 1                  | -0.594         | -0.520      | -0.636     | -0.319    | -0.201          | -0.251        | 0.305        | 0.198    |
| Total body fat       |          |                |                      |                     |         |               |                     |                    |        |              |                    |                   |                    | 1              | 0.918       | 0.940      | 0.664     | 0.117           | 0.151         | -0.463       | -0.330   |
| Android fat          |          |                |                      |                     |         |               |                     |                    |        |              |                    |                   |                    |                | 1           | 0.789      | 0.891     | 0.067           | 0.103         | -0.491       | -0.306   |
| Gynoid fat           |          |                |                      |                     |         |               |                     |                    |        |              |                    |                   |                    |                |             | 1          | 0.437     | 0.170           | 0.221         | -0.335       | -0.364   |
| A/G ratio            |          |                |                      |                     |         |               |                     |                    |        |              |                    |                   |                    |                |             |            | 1         | 0.001           | 0.021         | -0.474       | -0.177   |
| Total lean mass      |          |                |                      |                     |         |               |                     |                    |        |              |                    |                   |                    |                |             |            |           | 1               | 0.964         | -0.095       | 0.207    |
| Leg lean mass        |          |                |                      |                     |         |               |                     |                    |        |              |                    |                   |                    |                |             |            |           |                 | 1             | -0.148       | 0.136    |
| All exercise         |          |                |                      |                     |         |               |                     |                    |        |              |                    |                   |                    |                |             |            |           |                 |               | 1            | 0.545    |
| Football             |          |                |                      |                     |         |               |                     |                    |        |              |                    |                   |                    |                |             |            |           |                 |               |              | 1        |

A/G ratio, android/gynoid fat ratio; All exercise, hours of weekly exercise of all types; Football, hours of weekly football training; Lymph, lymphocytes; MNC, mononuclear cells; Mono, monocytes; mtDNA-CN, mitochondrial copy number; TL, telomere length; VO<sub>2max</sub>, maximal oxygen consumption.

**Suppl. Table 7.** Spearman's correlations between the investigated variables in young untrained controls (YC,  $n=30$ ).

|                      | Lymph TL | Lymph mtDNA-CN | Lymph PGC-1 $\alpha$ | Lymph PGC-1 $\beta$ | Mono TL | Mono mtDNA-CN | Mono PGC-1 $\alpha$ | Mono PGC-1 $\beta$ | MNC TL | MNC mtDNA-CN | MNC PGC-1 $\alpha$ | MNC PGC-1 $\beta$ | VO <sub>2max</sub> | Total body fat | Android fat | Gynoid fat | A/G ratio | Total lean mass | Leg lean mass | All exercise |
|----------------------|----------|----------------|----------------------|---------------------|---------|---------------|---------------------|--------------------|--------|--------------|--------------------|-------------------|--------------------|----------------|-------------|------------|-----------|-----------------|---------------|--------------|
| Lymph TL             | 1        | 0.231          | 0.143                | 0.082               | 0.457   | -0.227        | 0.187               | 0.056              | 0.614  | -0.317       | 0.110              | -0.040            | -0.076             | -0.027         | -0.051      | 0.026      | -0.041    | 0.098           | -0.008        | -0.116       |
| Lymph mtDNA-CN       |          | 1              | 0.492                | 0.329               | -0.166  | -0.031        | 0.368               | 0.215              | 0.123  | 0.362        | 0.083              | 0.173             | -0.316             | 0.289          | 0.307       | 0.257      | 0.288     | 0.123           | 0.108         | -0.154       |
| Lymph PGC-1 $\alpha$ |          |                | 1                    | 0.244               | -0.115  | 0.076         | 0.849               | 0.004              | -0.183 | -0.155       | 0.424              | 0.078             | 0.167              | -0.180         | -0.192      | -0.189     | -0.151    | 0.029           | -0.040        | -0.159       |
| Lymph PGC-1 $\beta$  |          |                |                      | 1                   | -0.145  | -0.158        | 0.217               | 0.713              | 0.150  | 0.110        | -0.134             | 0.567             | -0.241             | 0.371          | 0.315       | 0.363      | 0.237     | 0.273           | 0.326         | -0.115       |
| Mono TL              |          |                |                      |                     | 1       | -0.025        | 0.005               | -0.077             | 0.531  | -0.153       | 0.099              | -0.152            | -0.058             | -0.082         | -0.098      | -0.011     | -0.131    | -0.076          | -0.107        | -0.160       |
| Mono mtDNA-CN        |          |                |                      |                     |         | 1             | -0.082              | -0.089             | -0.259 | 0.289        | 0.113              | -0.008            | 0.161              | -0.054         | -0.032      | -0.143     | 0.046     | -0.080          | -0.067        | 0.084        |
| Mono PGC-1 $\alpha$  |          |                |                      |                     |         |               | 1                   | 0.075              | -0.087 | -0.143       | 0.541              | 0.112             | 0.261              | -0.274         | -0.281      | -0.262     | -0.233    | -0.079          | -0.141        | -0.119       |
| Mono PGC-1 $\beta$   |          |                |                      |                     |         |               |                     | 1                  | 0.263  | 0.072        | 0.002              | 0.588             | -0.124             | 0.302          | 0.225       | 0.377      | 0.089     | 0.190           | 0.297         | -0.129       |
| MNC TL               |          |                |                      |                     |         |               |                     |                    | 1      | 0.070        | 0.079              | 0.043             | -0.013             | 0.033          | 0.011       | 0.135      | -0.045    | -0.001          | -0.023        | -0.248       |
| MNC mtDNA-CN         |          |                |                      |                     |         |               |                     |                    |        | 1            | -0.058             | -0.035            | -0.208             | 0.282          | 0.288       | 0.309      | 0.243     | -0.031          | 0.033         | 0.003        |
| MNC PGC-1 $\alpha$   |          |                |                      |                     |         |               |                     |                    |        |              | 1                  | 0.225             | 0.478              | -0.409         | -0.376      | -0.436     | -0.290    | -0.038          | -0.092        | -0.104       |
| MNC PGC-1 $\beta$    |          |                |                      |                     |         |               |                     |                    |        |              |                    | 1                 | 0.206              | -0.111         | -0.073      | -0.165     | -0.039    | -0.096          | -0.052        | -0.221       |
| VO <sub>2max</sub>   |          |                |                      |                     |         |               |                     |                    |        |              |                    |                   | 1                  | -0.856         | -0.787      | -0.830     | -0.669    | -0.266          | -0.317        | -0.011       |
| Total body fat       |          |                |                      |                     |         |               |                     |                    |        |              |                    |                   |                    | 1              | 0.956       | 0.937      | 0.831     | 0.425           | 0.533         | 0.126        |
| Android fat          |          |                |                      |                     |         |               |                     |                    |        |              |                    |                   |                    |                | 1           | 0.826      | 0.948     | 0.459           | 0.568         | 0.177        |
| Gynoid fat           |          |                |                      |                     |         |               |                     |                    |        |              |                    |                   |                    |                |             | 1          | 0.617     | 0.388           | 0.482         | 0.019        |
| A/G ratio            |          |                |                      |                     |         |               |                     |                    |        |              |                    |                   |                    |                |             |            | 1         | 0.410           | 0.512         | 0.243        |
| Total lean mass      |          |                |                      |                     |         |               |                     |                    |        |              |                    |                   |                    |                |             |            |           | 1               | 0.966         | 0.359        |
| Leg lean mass        |          |                |                      |                     |         |               |                     |                    |        |              |                    |                   |                    |                |             |            |           |                 | 1             | 0.371        |
| All exercise         |          |                |                      |                     |         |               |                     |                    |        |              |                    |                   |                    |                |             |            |           |                 |               | 1            |

A/G ratio, android/gynoid fat ratio; All exercise, hours of weekly exercise of all types; Lymph, lymphocytes; MNC, mononuclear cells; Mono, monocytes; mtDNA-CN, mitochondrial copy number; TL, telomere length; VO<sub>2max</sub>, maximal oxygen consumption.

**Suppl. Table 8.** Spearman's correlations between the investigated variables in elderly team handball players (EH,  $n=35$ ).

|                      | Lymph TL | Lymph mtDNA-CN | Lymph PGC-1 $\alpha$ | Lymph PGC-1 $\beta$ | Mono TL | Mono mtDNA-CN | Mono PGC-1 $\alpha$ | Mono PGC-1 $\beta$ | MNC TL | MNC mtDNA-CN | MNC PGC-1 $\alpha$ | MNC PGC-1 $\beta$ | VO <sub>2max</sub> | Total body fat | Android fat | Gynoid fat | A/G ratio | Total lean mass | Leg lean mass | All exercise | Team handball |
|----------------------|----------|----------------|----------------------|---------------------|---------|---------------|---------------------|--------------------|--------|--------------|--------------------|-------------------|--------------------|----------------|-------------|------------|-----------|-----------------|---------------|--------------|---------------|
| Lymph TL             | 1        | 0.638          | -0.243               | 0.230               | 0.782   | 0.387         | -0.073              | 0.314              | 0.839  | 0.608        | -0.090             | 0.070             | 0.056              | -0.200         | -0.172      | -0.158     | -0.182    | -0.101          | -0.143        | -0.141       | 0.041         |
| Lymph mtDNA-CN       |          | 1              | 0.096                | 0.114               | 0.615   | 0.642         | -0.241              | -0.072             | 0.584  | 0.773        | -0.156             | -0.230            | 0.038              | -0.002         | -0.028      | 0.064      | -0.092    | -0.005          | 0.078         | -0.066       | 0.127         |
| Lymph PGC-1 $\alpha$ |          |                | 1                    | 0.331               | -0.289  | 0.176         | 0.303               | 0.076              | -0.207 | 0.167        | 0.255              | -0.105            | 0.083              | 0.069          | 0.080       | -0.020     | 0.172     | 0.051           | 0.100         | 0.157        | 0.007         |
| Lymph PGC-1 $\beta$  |          |                |                      | 1                   | 0.066   | 0.195         | 0.063               | 0.653              | 0.313  | 0.360        | 0.150              | 0.343             | 0.426              | -0.449         | -0.428      | -0.482     | -0.338    | 0.168           | 0.133         | 0.468        | 0.291         |
| Mono TL              |          |                |                      |                     | 1       | 0.607         | -0.168              | 0.130              | 0.831  | 0.577        | -0.132             | -0.125            | -0.032             | -0.197         | -0.194      | -0.134     | -0.199    | -0.137          | -0.236        | -0.211       | 0.214         |
| Mono mtDNA-CN        |          |                |                      |                     |         | 1             | -0.170              | -0.108             | 0.446  | 0.629        | -0.147             | -0.297            | 0.120              | -0.095         | -0.091      | -0.079     | -0.066    | -0.051          | -0.083        | 0.088        | 0.354         |
| Mono PGC-1 $\alpha$  |          |                |                      |                     |         |               | 1                   | 0.337              | -0.029 | -0.057       | 0.685              | 0.115             | 0.135              | -0.207         | -0.256      | -0.160     | -0.273    | 0.093           | -0.030        | 0.257        | 0.052         |
| Mono PGC-1 $\beta$   |          |                |                      |                     |         |               |                     | 1                  | 0.271  | 0.071        | 0.302              | 0.454             | 0.111              | -0.340         | -0.335      | -0.323     | -0.302    | 0.026           | -0.069        | 0.243        | 0.107         |
| MNC TL               |          |                |                      |                     |         |               |                     |                    | 1      | 0.668        | -0.042             | -0.053            | -0.007             | -0.262         | -0.254      | -0.201     | -0.271    | -0.013          | -0.081        | -0.108       | 0.201         |
| MNC mtDNA-CN         |          |                |                      |                     |         |               |                     |                    |        | 1            | 0.017              | -0.158            | 0.204              | -0.252         | -0.258      | -0.173     | -0.262    | 0.193           | 0.200         | 0.166        | 0.292         |
| MNC PGC-1 $\alpha$   |          |                |                      |                     |         |               |                     |                    |        |              | 1                  | 0.387             | 0.173              | -0.289         | -0.368      | -0.188     | -0.422    | 0.068           | -0.031        | 0.125        | 0.215         |
| MNC PGC-1 $\beta$    |          |                |                      |                     |         |               |                     |                    |        |              |                    | 1                 | 0.396              | -0.376         | -0.343      | -0.383     | -0.263    | -0.023          | -0.155        | 0.169        | 0.085         |
| VO <sub>2max</sub>   |          |                |                      |                     |         |               |                     |                    |        |              |                    |                   | 1                  | -0.748         | -0.707      | -0.728     | -0.542    | 0.382           | 0.153         | 0.595        | 0.401         |
| Total body fat       |          |                |                      |                     |         |               |                     |                    |        |              |                    |                   |                    | 1              | 0.971       | 0.930      | 0.795     | -0.394          | -0.035        | -0.501       | -0.492        |
| Android fat          |          |                |                      |                     |         |               |                     |                    |        |              |                    |                   |                    |                | 1           | 0.834      | 0.910     | -0.403          | -0.067        | -0.542       | -0.540        |
| Gynoid fat           |          |                |                      |                     |         |               |                     |                    |        |              |                    |                   |                    |                |             | 1          | 0.544     | -0.294          | 0.038         | -0.437       | -0.364        |
| A/G ratio            |          |                |                      |                     |         |               |                     |                    |        |              |                    |                   |                    |                |             |            | 1         | -0.405          | -0.151        | -0.513       | -0.536        |
| Total lean mass      |          |                |                      |                     |         |               |                     |                    |        |              |                    |                   |                    |                |             |            |           | 1               | 0.883         | 0.411        | 0.100         |
| Leg lean mass        |          |                |                      |                     |         |               |                     |                    |        |              |                    |                   |                    |                |             |            |           |                 | 1             | 0.291        | -0.080        |
| All exercise         |          |                |                      |                     |         |               |                     |                    |        |              |                    |                   |                    |                |             |            |           |                 |               | 1            | 0.522         |
| Team handball        |          |                |                      |                     |         |               |                     |                    |        |              |                    |                   |                    |                |             |            |           |                 |               |              | 1             |

A/G ratio, android/gynoid fat ratio; All exercise, hours of weekly exercise of all types; Lymph, lymphocytes; MNC, mononuclear cells; Mono, monocytes; mtDNA-CN, mitochondrial copy number; Team handball, hours of weekly team handball training; TL, telomere length; VO<sub>2max</sub>, maximal oxygen consumption.

**Suppl. Table 9.** Spearman's correlations between the investigated variables in elderly untrained controls (EC,  $n=35$ ).

|                      | Lymph TL | Lymph mtDNA-CN | Lymph PGC-1 $\alpha$ | Lymph PGC-1 $\beta$ | Mono TL | Mono mtDNA-CN | Mono PGC-1 $\alpha$ | Mono PGC-1 $\beta$ | MNC TL | MNC mtDNA-CN | MNC PGC-1 $\alpha$ | MNC PGC-1 $\beta$ | VO <sub>2max</sub> | Total body fat | Android fat | Gynoid fat | A/G ratio | Total lean mass | Leg lean mass | All exercise |
|----------------------|----------|----------------|----------------------|---------------------|---------|---------------|---------------------|--------------------|--------|--------------|--------------------|-------------------|--------------------|----------------|-------------|------------|-----------|-----------------|---------------|--------------|
| Lymph TL             | 1        | 0.575          | -0.028               | 0.040               | 0.652   | 0.218         | -0.107              | -0.005             | 0.706  | 0.334        | 0.014              | -0.010            | 0.128              | -0.107         | -0.187      | 0.064      | -0.240    | -0.275          | -0.292        | -0.313       |
| Lymph mtDNA-CN       |          | 1              | 0.310                | -0.083              | 0.337   | 0.163         | -0.009              | -0.055             | 0.554  | 0.688        | 0.026              | 0.163             | -0.043             | -0.088         | -0.225      | 0.178      | -0.332    | -0.128          | -0.229        | -0.117       |
| Lymph PGC-1 $\alpha$ |          |                | 1                    | 0.201               | -0.104  | 0.207         | 0.538               | 0.006              | 0.017  | 0.190        | 0.539              | 0.025             | 0.164              | -0.199         | -0.123      | -0.288     | -0.008    | -0.017          | -0.057        | -0.018       |
| Lymph PGC-1 $\beta$  |          |                |                      | 1                   | -0.119  | -0.146        | 0.006               | 0.553              | -0.067 | -0.126       | 0.079              | 0.398             | 0.214              | -0.141         | -0.013      | -0.418     | 0.160     | 0.155           | 0.077         | -0.119       |
| Mono TL              |          |                |                      |                     | 1       | 0.225         | -0.017              | -0.067             | 0.320  | 0.256        | 0.058              | -0.165            | 0.009              | 0.041          | -0.042      | 0.164      | -0.115    | -0.185          | -0.180        | -0.075       |
| Mono mtDNA-CN        |          |                |                      |                     |         | 1             | 0.131               | -0.257             | -0.036 | 0.178        | 0.195              | -0.305            | -0.103             | -0.116         | -0.182      | 0.177      | -0.302    | -0.065          | -0.048        | 0.111        |
| Mono PGC-1 $\alpha$  |          |                |                      |                     |         |               | 1                   | 0.148              | -0.014 | 0.327        | 0.896              | -0.097            | -0.140             | 0.083          | 0.052       | 0.081      | 0.024     | 0.023           | 0.040         | -0.139       |
| Mono PGC-1 $\beta$   |          |                |                      |                     |         |               |                     | 1                  | 0.003  | 0.127        | 0.111              | 0.580             | -0.162             | 0.179          | 0.135       | -0.096     | 0.161     | 0.217           | 0.181         | -0.278       |
| MNC TL               |          |                |                      |                     |         |               |                     |                    | 1      | 0.401        | 0.075              | -0.010            | 0.217              | -0.187         | -0.303      | 0.029      | -0.354    | -0.270          | -0.343        | -0.179       |
| MNC mtDNA-CN         |          |                |                      |                     |         |               |                     |                    |        | 1            | 0.338              | 0.217             | -0.072             | -0.116         | -0.343      | 0.303      | -0.518    | -0.013          | -0.153        | -0.014       |
| MNC PGC-1 $\alpha$   |          |                |                      |                     |         |               |                     |                    |        |              | 1                  | 0.003             | 0.017              | -0.086         | -0.107      | -0.065     | -0.096    | -0.049          | -0.083        | -0.077       |
| MNC PGC-1 $\beta$    |          |                |                      |                     |         |               |                     |                    |        |              |                    | 1                 | -0.221             | 0.144          | 0.097       | -0.081     | 0.129     | 0.089           | 0.009         | -0.092       |
| VO <sub>2max</sub>   |          |                |                      |                     |         |               |                     |                    |        |              |                    |                   | 1                  | -0.790         | -0.683      | -0.633     | -0.463    | -0.252          | -0.351        | 0.128        |
| Total body fat       |          |                |                      |                     |         |               |                     |                    |        |              |                    |                   |                    | 1              | 0.931       | 0.672      | 0.709     | 0.269           | 0.436         | -0.207       |
| Android fat          |          |                |                      |                     |         |               |                     |                    |        |              |                    |                   |                    |                | 1           | 0.428      | 0.903     | 0.287           | 0.454         | -0.256       |
| Gynoid fat           |          |                |                      |                     |         |               |                     |                    |        |              |                    |                   |                    |                |             | 1          | 0.009     | 0.159           | 0.281         | 0.034        |
| A/G ratio            |          |                |                      |                     |         |               |                     |                    |        |              |                    |                   |                    |                |             |            | 1         | 0.254           | 0.383         | -0.269       |
| Total lean mass      |          |                |                      |                     |         |               |                     |                    |        |              |                    |                   |                    |                |             |            |           | 1               | 0.944         | 0.129        |
| Leg lean mass        |          |                |                      |                     |         |               |                     |                    |        |              |                    |                   |                    |                |             |            |           |                 | 1             | 0.118        |
| All exercise         |          |                |                      |                     |         |               |                     |                    |        |              |                    |                   |                    |                |             |            |           |                 |               | 1            |

A/G ratio, android/gynoid fat ratio; All exercise, hours of weekly exercise of all types; Lymph, lymphocytes; MNC, mononuclear cells; Mono, monocytes; mtDNA-CN, mitochondrial copy number; TL, telomere length; VO<sub>2max</sub>, maximal oxygen consumption.
